# Supplementary material for: The Development of Feeding Competence in Rehabilitant Orphaned Orangutans and How to Measure It
Source: MDPI journal article supplement (doi:10.3390/ani13132111), 2023-06-26
Supplement: s1 [file s1]

## Supplementary Materials

### **The development of feeding competence in rehabilitant orphaned orangutans and how to measure it**

Signe Preuschoft, Andrew J. Marshall, Lorna Scott, Siti Nur Badriyah, Melki Deus T. Purba,  
Erma Yuliani, Paloma Corbi, Ishak Yassir, M. Ari Wibawanto, Elfriede Kalcher-Sommersguter

Table S1: YJP list of plants eaten over 26 months from January 2019 to February 2021.

| Family          | Genus                     | Growth form   | Parts of Plants consumed | Mean<br>(% of months consumed) | Range<br>(% of months consumed) | In plant lists** | Modelled by caregivers |
|-----------------|---------------------------|---------------|--------------------------|--------------------------------|---------------------------------|------------------|------------------------|
| Moraceae        | <i>Ficus</i> spp          | Tree, Liana   | B, F, L, St, YL          | 99                             | 95-100                          | Yes              | Yes                    |
| Annonaceae      | <i>Artabotrys</i> spp     | Liana         | F                        | 98                             | 96-100                          | Yes              | No                     |
| Aracaceae       | <i>Calamus</i> spp        | Herb (Rattan) | F, P                     | 98                             | 95-100                          | Yes              | Yes                    |
| Aracaceae       | <i>Borassodendron</i> spp | Tree (Palm)   | F, Fl, P                 | 96                             | 92-100                          | Yes              | Yes                    |
| Zingiberaceae   | <i>Alpinia</i> spp        | Herb          | F, P                     | 91                             | 65-100                          | Yes              | Yes                    |
| Moraceae        | <i>Artocarpus</i> spp     | Tree          | B, F, St, YL             | 85                             | 81-92                           | Yes              | Yes                    |
| Pandanaceae     | <i>Pandanus</i> spp       | Herb          | F, P                     | 85                             | 75-92                           | Yes              | Yes                    |
| Melastomataceae | <i>Pternandra</i> spp     | Tree          | F                        | 83                             | 65-92                           | Yes              | Yes                    |
| Gramineae       | <i>Bambusa</i> spp        | Herb          | P                        | 80                             | 45-96                           | Yes              | Yes                    |
| Lamiaceae       | <i>Callicarpa</i> spp     | Tree          | F, Fl                    | 78                             | 62-88                           | Yes              | Yes                    |
| Myrtaceae       | <i>Syzygium</i> spp       | Tree          | F                        | 75                             | 62-85                           | Yes              | Yes                    |
| Ebenaceae       | <i>Diospyros</i> spp      | Tree          | F                        | 66                             | 27-88                           | Yes              | Yes                    |
| Leguminosae     | <i>Fordia</i> spp         | Tree          | Fl, S, St                | 59                             | 25-85                           | Yes              | Yes                    |
| Anacardiaceae   | <i>Dracontomelon</i> spp  | Tree          | F                        | 57                             | 31-77                           | Yes              | No                     |
| Myrsinaceae     | <i>Maesa</i> spp          | Liana         | F                        | 57                             | 38-73                           | Yes              | No                     |
| Arecaceae       | <i>Oncosperma</i> spp     | Tree (Palm)   | F, Fl, P                 | 55                             | 46-65                           | Yes              | Yes                    |
| Cyperaceae      | <i>Scleria</i> spp        | Herb          | St                       | 52                             | 12-81                           | Yes              | Yes                    |
| Euphorbiaceae   | <i>Macaranga</i> spp      | Tree          | S                        | 51                             | 38-65                           | Yes              | Yes                    |
| Annonaceae      | <i>Polyalthia</i> spp     | Tree          | F                        | 48                             | 38-65                           | Yes              | Yes                    |
| Marantaceae     | <i>Donax</i> spp          | Herb          | St                       | 46                             | 5-81                            | Yes              | No                     |
| Dilleniaceae    | <i>Dillenia</i> spp       | Tree          | F, Fl, St                | 43                             | 27-65                           | Yes              | Yes                    |
| Hypoxidaceae    | <i>Curculigo</i> spp      | Herb          | F, P                     | 42                             | 10-54                           | Yes              | Yes                    |
| Sterculiaceae   | <i>Sterculia</i> spp      | Tree          | Fl, S                    | 38                             | 0-69                            | Yes              | Yes                    |
| Pteridophyta    | <i>Stenochlaena</i> spp   | Herb, Climber | St, YL                   | 37                             | 0-69                            | Yes              | Yes                    |
| Rubiaceae       | <i>Urophyllum</i> spp     | Tree          | F                        | 36                             | 20-54                           | Yes              | No                     |
| Vitaceae        | <i>Leea</i> spp           | Tree          | F, St                    | 36                             | 0-62                            | Yes              | No                     |
| Fabaceae        | <i>Archidendron</i> spp   | Tree          | B, S                     | 35                             | 23-54                           | Yes              | Yes                    |
| Polygalaceae    | <i>Xanthophyllum</i> spp  | Tree          | F, Fl, L, St, YL         | 34                             | 15-60                           | Yes              | Yes                    |
| Euphorbiaceae   | <i>Baccaurea</i> spp      | Tree          | F, Fl                    | 32                             | 27-38                           | Yes              | Yes                    |
| Myristicaceae   | <i>Knema</i> spp          | Tree          | F                        | 32                             | 15-60                           | Yes              | Yes                    |
| Euphorbiaceae   | <i>Aporosa</i> spp        | Tree          | F                        | 32                             | 27-40                           | Yes              | Yes                    |
| Irvingiaceae    | <i>Irvingia</i> spp       | Tree          | F                        | 31                             | 23-42                           | Yes              | Yes                    |
| Annonaceae      | <i>Cananga</i> spp        | Tree          | F                        | 31                             | 0-50                            | No               | No                     |
| Clusiaceae      | <i>Garcinia</i> spp       | Tree          | F                        | 30                             | 23-42                           | Yes              | Yes                    |
| Ulmaceae        | <i>Gironniera</i> spp     | Tree          | B, F                     | 30                             | 12-46                           | Yes              | No                     |
| Fagaceae        | <i>Castanopsis</i> spp    | Tree          | S                        | 30                             | 23-35                           | Yes              | Yes                    |
| Lauraceae       | <i>Litsea</i> spp         | Tree          | F                        | 30                             | 23-35                           | Yes              | No                     |
| Rutaceae        | <i>Melicope</i> spp       | Tree          | B, S                     | 29                             | 15-35                           | No               | Yes                    |
| Symplocaceae    | <i>Symplocos</i> spp      | Tree          | F, Fl, YL                | 29                             | 0-70                            | Yes              | No                     |
| Sapotaceae      | <i>Palaquium</i> spp      | Tree          | F                        | 28                             | 15-38                           | Yes              | No                     |
| Dracaenaceae    | <i>Dracaena</i> spp       | Herb          | F, P                     | 26                             | 12-50                           | Yes              | No                     |
| Euphorbiaceae   | <i>Antidesma</i> spp      | Tree          | F                        | 24                             | 12-42                           | Yes              | Yes                    |
| Melastomataceae | <i>Clidemia</i> spp       | Shrub         | F                        | 24                             | 5-42                            | Yes              | Yes                    |
| Elaeocarpaceae  | <i>Elaeocarpus</i> spp    | Tree          | F                        | 24                             | 15-35                           | Yes              | Yes                    |
| Athyriaceae     | <i>Diplazium</i> spp      | Herb          | St                       | 23                             | 0-38                            | No               | Yes                    |
| Poaceae         | <i>Saccharum</i> spp      | Herb          | St                       | 21                             | 0-38                            | No               | Yes                    |
| Fagaceae        | <i>Lithocarpus</i> spp    | Tree          | S                        | 20                             | 15-27                           | Yes              | Yes                    |
| Sapotaceae      | <i>Madhuca</i> spp        | Tree          | F                        | 19                             | 15-27                           | Yes              | No                     |
| Lecythidaceae   | <i>Barringtonia</i> spp   | Tree          | Fl, S                    | 18                             | 4-35                            | Yes              | Yes                    |
| Aracaceae       | <i>Pholidocarpus</i> spp  | Tree (Palm)   | F                        | 18                             | 8-38                            | Yes              | No                     |
| Passifloraceae  | <i>Adenia</i> spp         | Liana         | F, S                     | 16                             | 0-27                            | Yes              | No                     |
| Euphorbiaceae   | <i>Bridelia</i> spp       | Tree          | F                        | 15                             | 10-19                           | Yes              | Yes                    |
| Meliaceae       | <i>Aglaia</i> spp         | Tree          | F, S                     | 14                             | 8-20                            | Yes              | Yes                    |
| Alangiaceae     | <i>Alangium</i> spp       | Tree          | F, S                     | 14                             | 12-20                           | Yes              | Yes                    |
| Euphorbiaceae   | <i>Glochidion</i> spp     | Tree          | F                        | 14                             | 4-35                            | Yes              | No                     |

| Family           | Genus                         | Growth form |          | Mean*<br>(% of months consumed) | Range*<br>(% of months consumed) | In plant lists** | Modelled by caregivers |
|------------------|-------------------------------|-------------|----------|---------------------------------|----------------------------------|------------------|------------------------|
| Fabaceae         | <i>Spatholobus</i> spp        | Liana       | S        | 14                              | 4-45                             | Yes              | Yes                    |
| Sapindaceae      | <i>Nephelium</i> spp          | Tree        | F        | 14                              | 8-20                             | Yes              | Yes                    |
| Smilacaceae      | <i>Smilax</i> spp             | Liana       | F, St    | 14                              | 0-35                             | Yes              | No                     |
| Asteraceae       | <i>Vernonia</i> spp           | Tree        | B, F, Fl | 14                              | 0-31                             | Yes              | Yes                    |
| Rubiaceae        | <i>Ixora</i> spp              | Shrub       | F, Fl    | 14                              | 4-30                             | Yes              | Yes                    |
| Rubiaceae        | <i>Neonauclea</i> spp         | Tree        | F        | 13                              | 4-27                             | Yes              | No                     |
| Cyperaceae       | <i>Mapania</i> spp            | Herb        | F, P     | 13                              | 0-23                             | Yes              | No                     |
| Combretaceae     | <i>Terminalia</i> spp         | Tree        | S        | 13                              | 0-31                             | Yes              | No                     |
| Apocynaceae      | <i>Alstonia</i> spp           | Tree        | B        | 12                              | 0-35                             | Yes              | Yes                    |
| Zingiberaceae    | <i>Zingiber</i> spp           | Herb        | F, P     | 11                              | 5-15                             | Yes              | Yes                    |
| Lamiaceae        | <i>Vitex</i> spp              | Tree        | F        | 11                              | 4-15                             | Yes              | No                     |
| Myrsinaceae      | <i>Embelia</i> spp            | Liana       | F        | 10                              | 0-30                             | Yes              | Yes                    |
| Bombacaceae      | <i>Durio</i> spp              | Tree        | F        | 10                              | 4-20                             | Yes              | No                     |
| Lecythidaceae    | <i>Planchonia</i> spp         | Tree        | F        | 10                              | 0-23                             | Yes              | No                     |
| Lauraceae        | <i>Alseodaphne</i> spp        | Tree        | F        | 9                               | 0-19                             | Yes              | No                     |
| Lauraceae        | <i>Eusideroxylon</i> spp      | Tree        | F        | 9                               | 0-25                             | Yes              | No                     |
| Melastomataceae  | <i>Melastoma</i> spp          | Tree        | F, Fl    | 9                               | 5-19                             | Yes              | Yes                    |
| Euphorbiaceae    | <i>Mallotus</i> spp           | Tree        | S        | 9                               | 0-31                             | Yes              | No                     |
| Annonaceae       | <i>Popowia</i> spp            | Tree        | F        | 8                               | 4-12                             | Yes              | Yes                    |
| Tiliaceae        | <i>Microcos</i> spp           | Tree        | F        | 8                               | 0-25                             | Yes              | No                     |
| Ampelidaceae     | <i>Tetrastigma</i> spp        | Liana       | F        | 8                               | 0-15                             | Yes              | No                     |
| Fabaceae         | <i>Callerya</i> spp           | Liana       | F, Fl, S | 7                               | 4-12                             | Yes              | Yes                    |
| Burseraceae      | <i>Dacryodes</i> spp          | Tree        | F        | 7                               | 4-12                             | Yes              | Yes                    |
| Euphorbiaceae    | <i>Paracroton</i> spp         | Tree        | F, Fl    | 6                               | 0-15                             | No               | No                     |
| Meliaceae        | <i>Reinwardtiadendron</i> spp | Tree        | F        | 6                               | 4-10                             | Yes              | No                     |
| Myrsinaceae      | <i>Ardisia</i> spp            | Tree        | F, Fl    | 6                               | 4-15                             | Yes              | No                     |
| Actinidiaceae    | <i>Saurauia</i> spp           | Tree        | F        | 6                               | 0-15                             | Yes              | No                     |
| Zingiberaceae    | <i>Plagiostachys</i> spp      | Herb        | F, St    | 5                               | 0-12                             | Yes              | No                     |
| Sapindaceae      | <i>Dimocarpus</i> spp         | Tree        | F        | 3                               | 0-4                              | Yes              | No                     |
| Cornaceae        | <i>Mastixia</i> spp           | Tree        | F        | 3                               | 0-10                             | Yes              | Yes                    |
| Anacardiaceae    | <i>Mangifera</i> spp          | Tree        | F        | 3                               | 0-10                             | Yes              | No                     |
| Myrtaceae        | <i>Rhodamnia</i> spp          | Tree        | F        | 3                               | 0-10                             | Yes              | No                     |
| Olacaceae        | <i>Scorodocarpus</i> spp      | Tree        | F        | 3                               | 0-8                              | Yes              | No                     |
| Annonaceae       | <i>Goniothalamus</i> spp      | Tree        | F        | 3                               | 0-8                              | Yes              | No                     |
| Rubiaceae        | <i>Porterandia</i> spp        | Tree        | F        | 3                               | 0-8                              | Yes              | No                     |
| Bombacaceae      | <i>Neesia</i> spp             | Tree        | S        | 3                               | 0-10                             | Yes              | No                     |
| Euphorbiaceae    | <i>Cleistanthus</i> spp       | Tree        | F        | 2                               | 0-8                              | Yes              | No                     |
| Myristicaceae    | <i>Myristica</i> spp          | Tree        | F        | 2                               | 0-5                              | Yes              | No                     |
| Dipterocarpaceae | <i>Dipterocarpus</i> spp      | Tree        | S        | 2                               | 0-8                              | Yes              | No                     |
| Meliaceae        | <i>Lansium</i> spp            | Tree        | F        | 2                               | 0-8                              | Yes              | No                     |
| Thymelaeaceae    | <i>Aquilaria</i> spp          | Tree        | B, F     | 2                               | 0-5                              | Yes              | No                     |
| Sapindaceae      | <i>Guioa</i> spp              | Tree        | F        | 2                               | 0-5                              | No               | No                     |
| Araceae          | <i>Aglaonema</i> spp          | Herb        | F        | 2                               | 0-4                              | Yes              | No                     |
| Lauraceae        | <i>Cryptocarya</i> spp        | Tree        | F        | 1                               | 0-5                              | Yes              | No                     |
| Burseraceae      | <i>Canarium</i> spp           | Tree        | F        | 1                               | 0-4                              | Yes              | No                     |
| Connaraceae      | <i>Cnestis</i> spp            | Liana       | F        | 1                               | 0-4                              | Yes              | No                     |
| Hypericaceae     | <i>Cratoxylum</i> spp         | Tree        | F        | 1                               | 0-8                              | Yes              | No                     |
| Fabaceae         | <i>Cynometra</i> spp          | Tree        | F        | 1                               | 0-4                              | Yes              | No                     |
| Lauraceae        | <i>Caryodaphnopsis</i> spp    | Tree        | S        | 1                               | 0-4                              | No               | No                     |
| Annonaceae       | <i>Enicosanthum</i> spp       | Tree        | F        | 1                               | 0-4                              | Yes              | No                     |
| Myristicaceae    | <i>Horsfieldia</i> spp        | Tree        | F        | 1                               | 0-4                              | Yes              | No                     |
| Dilleniaceae     | <i>Tetracera</i> spp          | Liana       | F        | 1                               | 0-5                              | Yes              | No                     |
| Theaceae         | <i>Camellia</i> spp           | Tree        | F        | 1                               | 0-4                              | No               | No                     |
| Dipterocarpaceae | <i>Shorea</i> spp             | Tree        | S        | 1                               | 0-4                              | Yes              | No                     |
| Annonaceae       | <i>Phaenanthus</i> spp        | Tree        | F        | 1                               | 0-4                              | No               | No                     |
| Apocynaceae      | <i>Willughbeia</i> spp        | Liana       | F        | 1                               | 0-4                              | Yes              | No                     |

\*Mean and range over all 7 orangutans (i.e., over 26 months for Eska, Cantik, Kartini, Tegar, Gonda and Gerhana; over 20 months for Amalia); \*\*Russon et al. 2009 and/or Kanamori et al. 2010

Abbreviations: B = Bark, F = Fruit, Fl = Flower, L = Leaves, P = Pith, S = Seed, St = Stem, YL = Young Leaves

Table S2: Food trees present in the forest school and producing fruit during the observation period.

| Missed opportunities      | Month(s) of fruiting |                    |
|---------------------------|----------------------|--------------------|
|                           | 2019                 | 2020               |
| <i>Callophyllum</i> spp   | Sep, Nov, Dec        |                    |
| <i>Cotylelobium</i> spp   | Jun, Jul, Dec        | Jan                |
| <i>Croton</i> spp         | Nov                  |                    |
| <i>Duabanga</i> spp       | Feb, Jul, Dec        | Jun, Jul           |
| <i>Endospermum</i> spp    | Jun, Jul, Dec        |                    |
| <i>Gluta</i> spp          | Nov, Dec             | Jan, Mar           |
| <i>Gonystylus</i> spp     | Dec                  |                    |
| <i>Gymnacranthera</i> spp | Nov, Dec             |                    |
| <i>Hopea</i> spp          | Dec                  | Jan, Feb           |
| <i>Hydnocarpus</i> spp    | Nov, Dec             | Jan, Feb           |
| <i>Ilex</i> spp           |                      | Jan                |
| <i>Koompassia</i> spp     |                      | Jan                |
| <i>Magnolia</i> spp       | Feb, Nov             | Feb                |
| <i>Monocarpia</i> spp     |                      | Jan                |
| <i>Ochanostachys</i> spp  |                      | Jan                |
| <i>Payena</i> spp         |                      | Apr, May           |
| <i>Pometia</i> spp        | Feb                  |                    |
| <i>Ryparosa</i> spp       | Feb, May             |                    |
| <i>Schima</i> spp         | Jun, Jul, Dec        | Jan, Feb, Aug, Sep |
| <i>Vatica</i> spp         |                      | Sep                |

Table S3: Relative frequencies (i.e., percent of months) per individual of the plant genera eaten most frequently.

| <b>Plant genera</b> | <b>Amalia</b> | <b>Eska</b> | <b>Cantik</b> | <b>Kartini</b> | <b>Tegar</b> | <b>Gonda</b> | <b>Gerhana</b> |
|---------------------|---------------|-------------|---------------|----------------|--------------|--------------|----------------|
| Borassodendron sp   | 95            | 100         | 100           | 92             | 92           | 92           | 100            |
| Ficus sp            | 95            | 100         | 100           | 100            | 100          | 100          | 100            |
| Calamus sp          | 95            | 100         | 100           | 96             | 100          | 100          | 96             |
| Artocarpus sp       | 90            | 92          | 81            | 88             | 81           | 85           | 81             |
| Alpinia sp          | 65            | 96          | 92            | 100            | 88           | 96           | 96             |
| Syzygium sp         | 85            | 85          | 77            | 65             | 77           | 77           | 62             |
| Pandanus sp         | 75            | 77          | 88            | 92             | 92           | 92           | 77             |
| Diospyros sp        | 75            | 77          | 88            | 27             | 31           | 77           | 85             |
| Pternandra sp       | 65            | 73          | 85            | 92             | 88           | 92           | 85             |
| Callicarpa sp       | 80            | 62          | 65            | 88             | 81           | 85           | 85             |
| Bambusa sp          | 45            | 69          | 69            | 92             | 96           | 92           | 92             |
| Fordia sp           | 25            | 46          | 46            | 73             | 62           | 85           | 77             |
| Scleria sp          | 20            | 12          | 27            | 69             | 73           | 81           | 81             |
| Artabotrys sp       | 100           | 96          | 96            | 100            | 100          | 100          | 96             |
| Donax sp            | 5             | 27          | 15            | 81             | 69           | 69           | 58             |

Table S4: YJP food plant list including genera and species.

| Genus            | Species                  | Part of plant    |
|------------------|--------------------------|------------------|
| Adenia spp       | Adenia macrophylla       |                  |
| Aglaia spp       | Aglaia macrocarpa        |                  |
| Aglaonema spp    |                          |                  |
| Alangium spp     | Alangium javanicum       |                  |
|                  | Alangium longiflorum     |                  |
|                  | Alangium ridley          | F                |
| Alpinia spp      |                          |                  |
| Alseodaphne spp  | Alseodaphne elmerii      |                  |
| Alstonia spp     | Alstonia iwahigensis     | Sa               |
|                  | Alstonia scholaris       | F                |
| Antidesma spp    | Antidesma neurocarpum    |                  |
| Aporosa spp      | Aporosa frutescens       |                  |
|                  | Aporosa grandistipula    |                  |
|                  | Aporosa indica           |                  |
|                  | Aporosa lucida           |                  |
|                  | Aporosa nitida           | F, S             |
|                  | Aporosa subcaudata       | S                |
| Aquilaria spp    | Aquilaria beccariana     |                  |
|                  | Aquilaria microcarpa     | F                |
| Archidendron spp | Archidendron clypearia   |                  |
|                  | Archidendron jiringa     |                  |
|                  | Archidendron microcarpum | YL               |
| Ardisia spp      | Ardisia crenata          |                  |
|                  | Ardisia forbesii         |                  |
| Artabotrys spp   | Artabotrys anisophyllus  |                  |
|                  | Artabotrys hexapetalus   |                  |
|                  | Artabotrys suaveolens    |                  |
| Artocarpus spp   | Artocarpus anisophyllus  | F, YL, Sa, Fl, S |
|                  | Artocarpus dadah         | F, YL            |
|                  | Artocarpus elasticus     | F, Sa            |
|                  | Artocarpus integer       | F, YL            |
|                  | Artocarpus kemando       |                  |
|                  | Artocarpus lanceifolius  | F, YL, Sa        |
|                  | Artocarpus nitidus       | F                |
|                  | Artocarpus odoratissimus | F, L, B          |
|                  | Artocarpus rigidus       | F, Sa            |
|                  | Artocarpus tamaran       | F, YL            |
|                  | Artocarpus tomentosulus  |                  |
| Baccaurea spp    | Baccaurea lanceolata     | F                |
|                  | Baccaurea macrocarpa     | F                |
|                  | Baccaurea odoratissima   |                  |
|                  | Baccaurea parviflora     |                  |
|                  | Baccaurea tetrandra      |                  |

| Genus               | Species                     | Part of plant |
|---------------------|-----------------------------|---------------|
| Bambusa spp         |                             |               |
| Barringtonia spp    | Barringtonia macrostachya   |               |
| Borassodendron spp  | Borassodendron borneensis   | F, Fl, P      |
| Bridelia spp        | Bridelia glauca             | F             |
| Calamus spp         | Calamus manan               |               |
| Callerya spp        |                             |               |
| Callicarpa spp      | Callicarpa longifolia       |               |
|                     | Callicarpa pentandra        |               |
| Calophyllum spp     | Calophyllum nodosum         | F             |
| Camellia spp        |                             |               |
| Cananga spp         | Cananga odorata             | F, B          |
| Canarium spp        | Canarium littorale          | F             |
| Caryodaphnopsis spp | Caryodaphnopsis tonkinensis |               |
| Castanopsis spp     | Castanopsis cf evansii      |               |
|                     | Castanopsis fulva           | F             |
| Cleistanthus spp    | Cleistanthus myrianthus     |               |
| Clidemia spp        | Clidemia hirta              |               |
| Cnestis spp         |                             |               |
| Cotylelobium spp    | Cotylelobium melanoxydon    | S             |
| Cratoxylum spp      | Cratoxylum sumatranum       |               |
| Croton spp          |                             |               |
| Cryptocarya spp     | Cryptocarya densiflora      |               |
| Curculigo spp       | Curculigo latifolia         |               |
| Cynometra spp       |                             |               |
| Dacryodes spp       | Dacryodes costata           |               |
|                     | Dacryodes rostrata          | F             |
|                     | Dacryodes rugosa            | F             |
| Dillenia spp        | Dillenia excelsa            | F, Fl         |
|                     | Dillenia indica             |               |
|                     | Dillenia nervosa            |               |
|                     | Dillenia reticulata         | F             |
|                     | Dillenia suffruticosa       |               |
| Dimocarpus spp      | Dimocarpus longan           | F             |
| Diospyros spp       | Diospyros borneensis        | F, YL         |
|                     | Diospyros confertiflora     | F, S, YL      |
|                     | Diospyros macrophylla       |               |
|                     | Diospyros cf sumatrana      |               |
| Diplazium spp       | Diplazium esculentum        |               |
| Dipterocarpus spp   | Dipterocarpus convertus     |               |
|                     | Dipterocarpus cornutus      | S, Fl         |
|                     | Dipterocarpus humeratus     | S, L, B       |
|                     | Dipterocarpus tempehes      | S             |
| Donax spp           | Donax canniformis           |               |
| Dracaena spp        |                             |               |
| Dracontomelon spp   | Dracontomelon dao           | F, YL, P      |

| Genus              | Species                     | Part of plant |
|--------------------|-----------------------------|---------------|
| Duabanga spp       | Duabanga moluccana          |               |
| Durio spp          | Durio acutifolius           | F, S          |
|                    | Durio dulcis                | F, S          |
|                    | Durio excelsus              |               |
|                    | Durio graveolens            |               |
|                    | Durio lanceolatus           | F             |
|                    | Durio zibethinus            |               |
| Elaeocarpus spp    | Elaeocarpus macrocerus      |               |
|                    | Elaeocarpus stipularis      | F, S          |
|                    | Elaeocarpus valetonii       |               |
| Embelia spp        | Embelia javanica            |               |
| Endospermum spp    | Endospermum diadenum        | YL            |
| Enicosanthum spp   | Enicosanthum paradoxum      | Fl            |
| Eusideroxylon spp  | Eusideroxylon zwageri       | F, YL, Fl     |
| Ficus spp          | Ficus aurata                |               |
|                    | Ficus callophylla           |               |
|                    | Ficus grossularioides       | F, YL         |
|                    | Ficus heteropleura          |               |
|                    | Ficus parviflora            |               |
|                    | Ficus punctata              |               |
|                    | Ficus stricta               |               |
|                    | Ficus sp 1                  |               |
|                    | Ficus sp 2                  |               |
|                    | Ficus sp 3                  |               |
|                    | Ficus variegata             | F, B          |
| Fordia spp         | Fordia splendidissima       | F, YL         |
| Garcinia spp       | Garcinia parvifolia         | F, L, YL      |
| Gironniera spp     | Gironniera nervosa          | F, YL, Sa     |
| Glochidion spp     | Glochidion arborescens      |               |
|                    | Glochidion sericeum         |               |
| Gluta spp          | Gluta macrocarpa            |               |
|                    | Gluta wallichii             | F, YL, Sa, Fl |
| Goniothalamus spp  | Goniothalamus macrophyllus  |               |
| Gonystylus spp     | Gonystylus affinis          | F             |
|                    | Gonystylus qansanguenius    |               |
| Guioa spp          | Guioa pleuropteris          |               |
| Gymnacranthera spp | Gymnacranthera farquhariana | F, B          |
| Hopea spp          | Hopea mangarawan            |               |
|                    | Hopea rudiformis            |               |
| Horsfieldia spp    | Horsfieldia grandis         | F             |
| Hydnocarpus spp    | Hydnocarpus polypetala      |               |
| Ilex spp           | Ilex cymosa                 | F, S, YL      |
| Irvingia spp       | Irvingia malayana           | F, Sa         |
| Ixora spp          | Ixora caudata               |               |
|                    | Ixora parviflora            |               |

| Genus           | Species                    | Part of plant |
|-----------------|----------------------------|---------------|
| Knema spp       | Knema latericia            | F             |
|                 | Knema latifolia            |               |
|                 | Knema laurina              |               |
|                 | Knema pallens              |               |
|                 | Knema pulchra              |               |
| Koompassia spp  | Koompassia malaccensis     | L             |
| Lansium spp     |                            |               |
| Leea spp        | Leea aculeata              |               |
|                 | Leea indica                | F             |
| Lithocarpus spp | Lithocarpus blumcanus      |               |
|                 | Lithocarpus coopertus      | F             |
|                 | Lithocarpus gracilis       | F             |
| Litsea spp      | Litsea cf angulata         |               |
|                 | Litsea elliptica           |               |
|                 | Litsea firma               |               |
|                 | Litsea garciae             | F, YL         |
| Macaranga spp   | Macaranga bancana          |               |
|                 | Macaranga conifera         | F             |
|                 | Macaranga gigantea         | F             |
|                 | Macaranga hypoleuca        | F             |
|                 | Macaranga motleyana        |               |
|                 | Macaranga pearsonii        | B             |
|                 | Macaranga tanarius         |               |
| Madhuca spp     | Madhuca motleyana          | F, Sa, Fl     |
|                 | Madhuca pierrei            |               |
|                 | Madhuca sericea            | F, YL         |
| Maesa spp       | Maesa ramentacea           |               |
| Magnolia spp    |                            |               |
| Mallotus spp    | Mallotus nesophilus        |               |
|                 | Mallotus penangensis       |               |
| Mangifera spp   | Mangifera foetida          | F             |
| Mapania spp     |                            |               |
| Mastixia spp    |                            |               |
| Melastoma spp   | Melastoma malabathricum    |               |
| Melicope spp    | Melicope glabra            | F             |
| Microcos spp    | Microcos antidesmifolia    |               |
|                 | Microcos crassifolia       | F, Sa         |
|                 | Microcos tomentosa         | F, YL         |
| Monocarpia spp  | Monocarpia kalimantanensis |               |
| Myristica spp   | Myristica elliptica        |               |
|                 | Myristica iners            |               |
|                 | Myristica maxima           | F             |
| Neesia spp      | Neesia synandra            | S             |
| Neonauclea spp  | Neonauclea gigantea        |               |
| Nephelium spp   | Nephelium cuspidatum       | F             |

| Genus                  | Species                  | Part of plant |
|------------------------|--------------------------|---------------|
| Nephelium spp          | Nephelium lappaceum      | F, S          |
|                        | Nephelium ramboutan-ake  | F             |
| Ochanostachys spp      | Ochanostachys amentacea  |               |
| Oncosperma spp         | Oncosperma horridum      | P             |
|                        | Oncosperma tigillarium   |               |
| Palaquium spp          | Palaquium beccarianum    |               |
|                        | Palaquium quercifolium   | F, Sa         |
|                        | Palaquium rostratum      | F             |
|                        | Palaquium sericeum       | F, YL         |
|                        | Palaquium stenophyllum   | F             |
| Pandanus spp           |                          |               |
| Paracroton spp         | Paracroton pendulus      |               |
| Payena spp             | Payena lucida            | F             |
| Phaenthus spp          | Phaeantus splendens      |               |
| Pholidocarpus spp      | Pholidocarpus kingianus  |               |
| Plagiostachys spp      |                          |               |
| Planchonia spp         |                          |               |
| Polyalthia spp         | Polyalthia cauliflora    |               |
|                        | Polyalthia lateriflora   |               |
|                        | Polyalthia rumphii       | F             |
|                        | Polyalthia sumatrana     |               |
| Pometia spp            | Pometia pinnata          | F, S, B       |
| Popowia spp            | Popowia hirta            |               |
|                        | Popowia pisocarpa        |               |
| Porterandia spp        | Porterandia anisophylla  | F, YL         |
| Pternandra spp         | Pternandra azurea        |               |
|                        | Pternandra coerulescens  |               |
|                        | Pternandra galeata       |               |
|                        | Pternandra rostrata      |               |
| Reinwardtiodendron spp |                          |               |
| Rhodamnia spp          | Rhodamnia cinerea        | F             |
| Ryparosa spp           | Ryparosa kostermansii    |               |
| Saccharum spp          | Saccharum spontaneum     |               |
| Saurauia spp           | Saurauia leucocarpa      |               |
| Schima spp             | Schima wallichii         | B             |
| Scleria spp            | Scleria sumatrensis      |               |
|                        | Scleria terrestris       |               |
| Scorodocarpus spp      | Scorodocarpus borneensis | F             |
| Shorea spp             | Shorea johorensis        |               |
|                        | Shorea laevis            | S             |
|                        | Shorea lamelata          |               |
|                        | Shorea leprosula         | L, B          |
|                        | Shorea ovalis            | S             |
|                        | Shorea parvifolia        | S             |
|                        | Shorea pauciflora        |               |

| Genus             | Species                  | Part of plant |
|-------------------|--------------------------|---------------|
| Shorea            | Shorea seminis           |               |
|                   | Shorea smithiana         |               |
| Smilax spp        |                          |               |
| Spatholobus spp   | Spatholobus ferrugineus  |               |
| Stenochlaena spp  | Stenochlaena palustris   |               |
| Sterculia spp     | Sterculia lanceifolia    |               |
|                   | Sterculia macrophylla    | S, B          |
|                   | Sterculia rubiginosa     | YL            |
|                   | Sterculia cf. stipulata  | YL            |
| Symplocos spp     | Symplocos fasciculata    | F, L, YL      |
| Syzygium spp      | Syzygium claviflorum     |               |
|                   | Syzygium lineatum        | F             |
|                   | Syzygium tawahense       | F             |
|                   | Syzygium zeylanicum      |               |
| Terminalia spp    | Terminalia catappa       |               |
|                   | Terminalia foetidissima  | F             |
|                   | Terminalia pallida       |               |
| Tetracera spp     |                          |               |
| Tetrastigma spp   |                          |               |
| Urophyllum spp    | Urophyllum arboreum      |               |
| Vatica spp        | Vatica umbonata          |               |
|                   | Vatica vinosa            |               |
| Vernonia spp      | Vernonia arborea         | B             |
| Vitex spp         | Vitex pinnata            | L, YL         |
| Willughbeia spp   | Willughbeia angustifolia |               |
| Xanthophyllum spp | Xanthophyllum affine     |               |
|                   | Xanthophyllum obscurum   | F, L, YL      |
| Zingiber spp      | Zingiber acaea           |               |

Abbreviations: B = Bark, F = Fruit, Fl = Flower, L = Leaves, P = Pith, S= Seed, Sa = Sap, YL= Young Leaves

Red = missed opportunities (see text for explanation)

Blue = possible mistakes (see text for explanation)
